# Supplementary material
Source: PubMed Central journal article supplement (PMC5300785)
Supplement: mmc1.pdf [file mmc1.pdf]

**Biophysical Journal, Volume 112**

**Supplemental Information**

**Cytoplasmic RNA-Protein Particles Exhibit Non-Gaussian Subdiffusive  
Behavior**

**Thomas J. Lampo, Stella Stylianidou, Mikael P. Backlund, Paul A. Wiggins, and Andrew J. Spakowitz**

# Cytoplasmic RNA-Protein Particles Exhibit Non-Gaussian Subdiffusive Behavior: Supplemental Information

Thomas J. Lampo<sup>1</sup>, Stella Stylianidou<sup>2</sup>, Mikael P. Backlund<sup>3</sup>, W.  
E. Moerner<sup>3</sup>, Paul A. Wiggins<sup>2,4,5</sup>, and Andrew J. Spakowitz<sup>1,6,7,8</sup>

1. *Department of Chemical Engineering, Stanford University, Stanford CA 94305*
2. *Department of Physics, University of Washington, Seattle WA 98195*
3. *Department of Chemistry, Stanford University, Stanford CA 94305*
4. *Department of Bioengineering, Washington University, Seattle WA 98195*
5. *Department of Microbiology, Washington University, Seattle WA 98195*
6. *Department of Applied Physics, Stanford University, Stanford CA 94305*
7. *Department of Materials Science, Stanford University, Stanford CA 94305*
8. *Biophysics Program, Stanford University, Stanford CA 94305*

- 
- [1] S. Stylianidou, N. J. Kuwada, and P. A. Wiggins, *Biophysical journal* **107**, 2684 (2014).
  - [2] M. A. Thompson, J. M. Casolari, M. Badieirostami, P. O. Brown, and W. Moerner, *Proceedings of the National Academy of Sciences* **107**, 17864 (2010).
  - [3] S. C. Weber, M. A. Thompson, W. E. Moerner, A. J. Spakowitz, and J. A. Theriot, *Biophysical Journal* **102**, 2443 (2012).

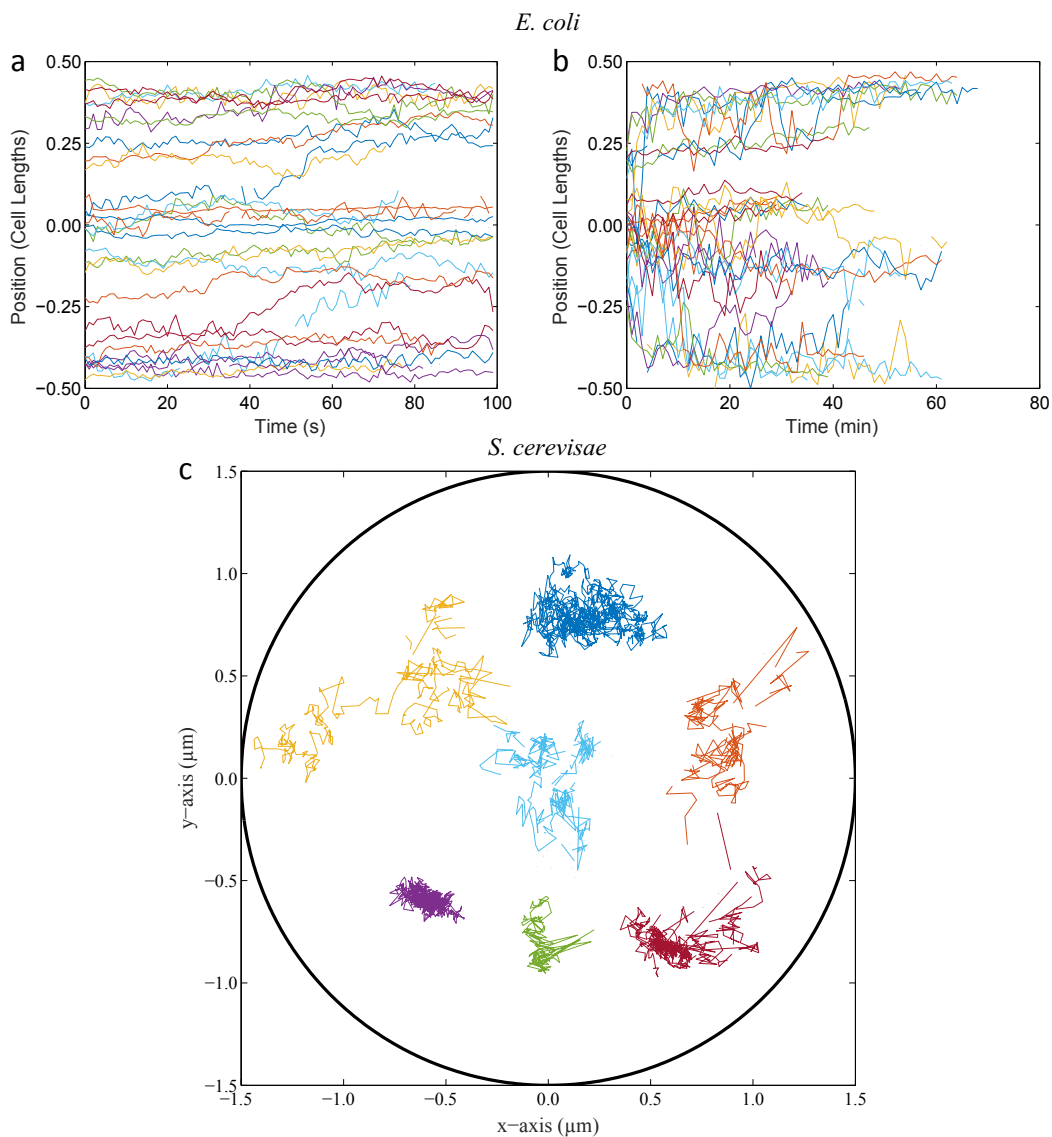

FIG. 1: **Representative trajectories of RNA-protein particles.** (ab) Sample trajectories of RNA-protein particles diffusing in the *E. coli* cytoplasm for (a) 1 s and (b) 1 min intervals between position measurements. (c) Sample trajectories placed arbitrarily in a circle with a diameter of 3  $\mu\text{m}$  (typical size of an *S. cerevisiae* cell).

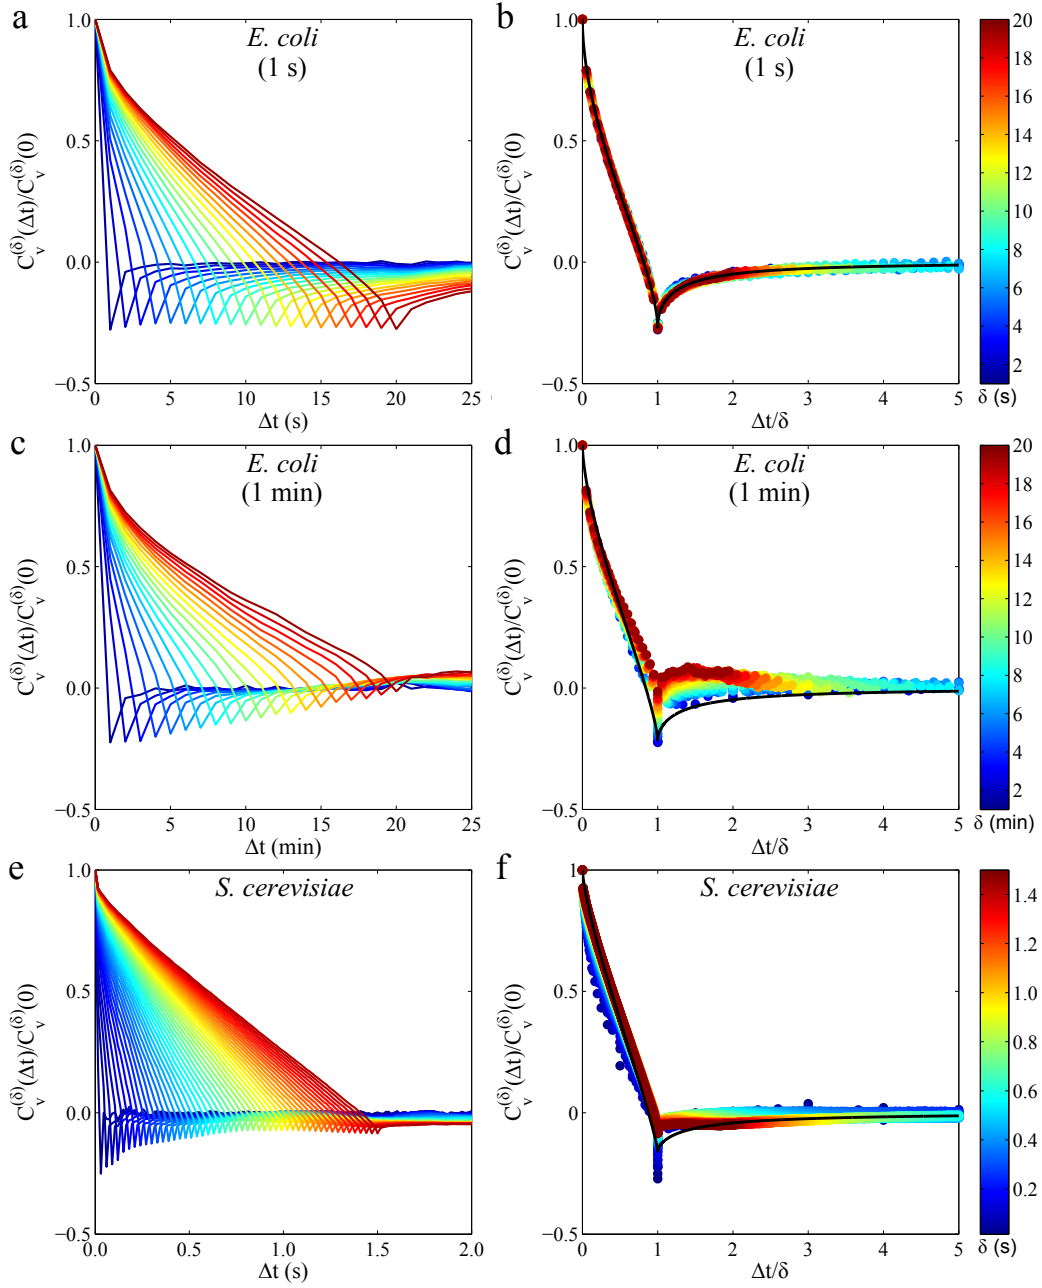

FIG. 2: **RNA-protein particles exhibit viscoelastic behavior.** (a-d) Velocity autocorrelation function of RNA-protein particles in *E. coli* for particle position measurements taken at one second intervals (a,b) and one minute intervals (c,d) [1] and corrected for drift due to cell growth. (e,f) Velocity autocorrelation function of RNA-protein particles in *S. cerevisiae* [2]. The velocity autocorrelation function is defined as  $C_v^{(\delta)}(\Delta t) = \langle v_\delta(\Delta t) \cdot v_\delta(0) \rangle$  where the velocity  $v_\delta(t) = [x(t + \delta) - x(t)]/\delta$  for the discrete time interval  $\delta$ . (b), (d), and (f) are the same as (a), (c), and (e) respectively but with a differently scaled x-axis to show that the negative correlation peak occurs at  $\Delta t/\delta = 1$ . The black lines in (b), (d), and (f) are theoretical predictions for fractional Brownian motion with the measured values of  $\alpha$  from the eMSD inserted into the equation  $[(\eta+1)^\alpha + |\eta-1|^\alpha - 2\eta^\alpha]/2$ , where  $\eta = \Delta t/\delta$  [3].

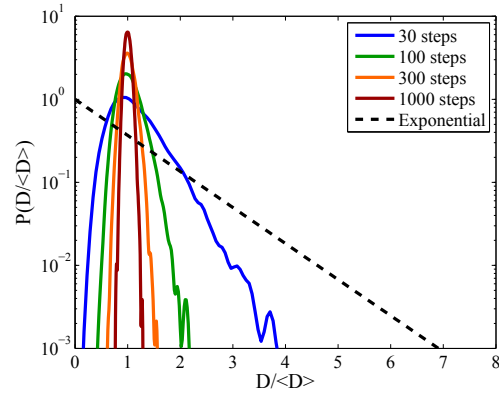

FIG. 3: **The effect of track length on the diffusivity distribution.** The distribution of diffusivities normalized by their mean for 10,000 fractional Brownian motion simulations of varying track lengths. Diffusivities are calculated using a power law fit to the first 15 points of each trajectory's time-averaged MSD. Distributions are plotted using a kernel density estimation with a Gaussian kernel and width determined by Silverman's rule of thumb.

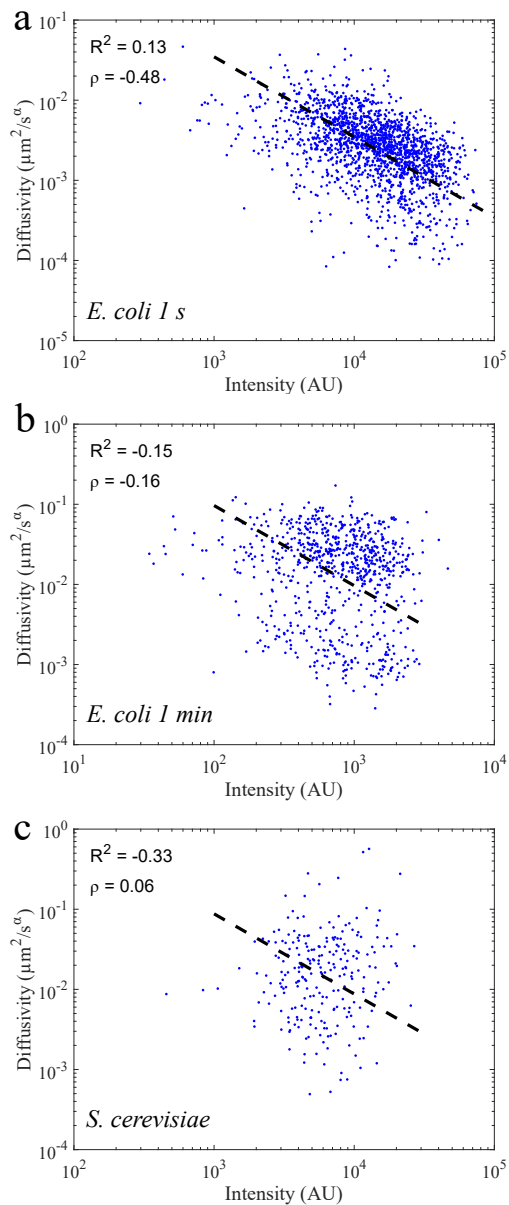

FIG. 4: **The relation between probe diffusivity and fluorescence intensity.** Particle diffusivities as a function of their mean intensity for the *e. coli* 1 s (a), *E. coli* 1 min (b), and the *S. cerevisiae* data (c). The black dashed line represents a best fit of the model  $y = A/x$  with fit parameter  $A$ . We show  $R^2$  and Pearson correlation coefficient ( $\rho$ ) for each model fit to the data on a loglog scale.

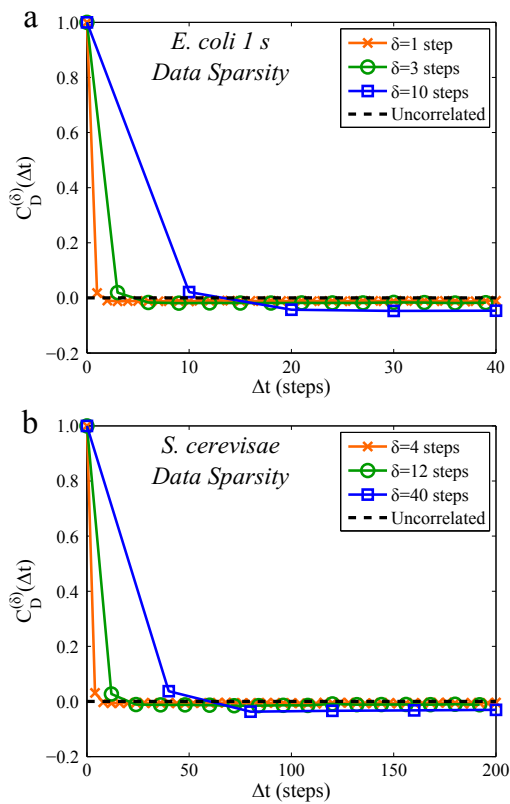

FIG. 5: **The effect of finite track lengths on the diffusivity autocorrelation function.** Diffusivity autocorrelation function for fractional Brownian motion simulations that have the same data sparsity and 10x the size of the *E. coli 1 s* data set (a) and the *S. cerevisiae* (b).
